# Supplementary material
Source: PubMed Central journal article supplement (PMC6609483)
Supplement: NIHMS1529303-supplement-Reporting_Summary.pdf [file NIHMS1529303-supplement-Reporting_Summary.pdf]

## Reporting Summary

Nature Research wishes to improve the reproducibility of the work that we publish. This form provides structure for consistency and transparency in reporting. For further information on Nature Research policies, see [Authors & Referees](#) and the [Editorial Policy Checklist](#).

### Statistics

For all statistical analyses, confirm that the following items are present in the figure legend, table legend, main text, or Methods section.

n/a Confirmed

- |                                     |                                     |                                                                                                                                                                                                                                                            |
|-------------------------------------|-------------------------------------|------------------------------------------------------------------------------------------------------------------------------------------------------------------------------------------------------------------------------------------------------------|
| <input type="checkbox"/>            | <input checked="" type="checkbox"/> | The exact sample size ( $n$ ) for each experimental group/condition, given as a discrete number and unit of measurement                                                                                                                                    |
| <input type="checkbox"/>            | <input checked="" type="checkbox"/> | A statement on whether measurements were taken from distinct samples or whether the same sample was measured repeatedly                                                                                                                                    |
| <input type="checkbox"/>            | <input checked="" type="checkbox"/> | The statistical test(s) used AND whether they are one- or two-sided<br><i>Only common tests should be described solely by name; describe more complex techniques in the Methods section.</i>                                                               |
| <input checked="" type="checkbox"/> | <input type="checkbox"/>            | A description of all covariates tested                                                                                                                                                                                                                     |
| <input type="checkbox"/>            | <input checked="" type="checkbox"/> | A description of any assumptions or corrections, such as tests of normality and adjustment for multiple comparisons                                                                                                                                        |
| <input type="checkbox"/>            | <input checked="" type="checkbox"/> | A full description of the statistical parameters including central tendency (e.g. means) or other basic estimates (e.g. regression coefficient) AND variation (e.g. standard deviation) or associated estimates of uncertainty (e.g. confidence intervals) |
| <input type="checkbox"/>            | <input checked="" type="checkbox"/> | For null hypothesis testing, the test statistic (e.g. $F$ , $t$ , $r$ ) with confidence intervals, effect sizes, degrees of freedom and $P$ value noted<br><i>Give <math>P</math> values as exact values whenever suitable.</i>                            |
| <input checked="" type="checkbox"/> | <input type="checkbox"/>            | For Bayesian analysis, information on the choice of priors and Markov chain Monte Carlo settings                                                                                                                                                           |
| <input checked="" type="checkbox"/> | <input type="checkbox"/>            | For hierarchical and complex designs, identification of the appropriate level for tests and full reporting of outcomes                                                                                                                                     |
| <input checked="" type="checkbox"/> | <input type="checkbox"/>            | Estimates of effect sizes (e.g. Cohen's $d$ , Pearson's $r$ ), indicating how they were calculated                                                                                                                                                         |

*Our web collection on [statistics for biologists](#) contains articles on many of the points above.*

### Software and code

Policy information about [availability of computer code](#)

Data collection

Olympus cellSens Standard 1.18 (for microscopic images), BD FACSDiva 8.0.1  
10X chromium 5'-mRNA library and BCR library kit  
HISEQ4000 (illumina sequencing)

Data analysis

Graphpad Prism 7.0a & 8.0, FlowJo 10.4.2, Cell Ranger 2.2.0 (10X chromium), Rv3.4.2, Python 3.5.4, IgBlast v1.7.0, Seurat v2, Chage-O v0.4.2, Alakazam v0.2.11, PHYLIP 3.696

For manuscripts utilizing custom algorithms or software that are central to the research but not yet described in published literature, software must be made available to editors/reviewers. We strongly encourage code deposition in a community repository (e.g. GitHub). See the Nature Research [guidelines for submitting code & software](#) for further information.

### Data

Policy information about [availability of data](#)

All manuscripts must include a [data availability statement](#). This statement should provide the following information, where applicable:

- Accession codes, unique identifiers, or web links for publicly available datasets
- A list of figures that have associated raw data
- A description of any restrictions on data availability

RNA-seq data will be deposited and made public in the BioProject under accession number PRJNA524497.

## Field-specific reporting

Please select the one below that is the best fit for your research. If you are not sure, read the appropriate sections before making your selection.

- Life sciences     Behavioural & social sciences     Ecological, evolutionary & environmental sciences

For a reference copy of the document with all sections, see [nature.com/documents/nr-reporting-summary-flat.pdf](https://www.nature.com/documents/nr-reporting-summary-flat.pdf)

## Life sciences study design

All studies must disclose on these points even when the disclosure is negative.

|                 |                                                                                                                                                                                                                                                                                                                                                                                  |
|-----------------|----------------------------------------------------------------------------------------------------------------------------------------------------------------------------------------------------------------------------------------------------------------------------------------------------------------------------------------------------------------------------------|
| Sample size     | No sample-size calculation was performed. We aimed to get at least 3 sample sizes in each group in each independent experiment based on our previous studies and/or pilot studies.                                                                                                                                                                                               |
| Data exclusions | No data were excluded.                                                                                                                                                                                                                                                                                                                                                           |
| Replication     | Experiments were repeated with at least two biologically independent for all results presented in the manuscript. If the group size was small (due to limited availability of reagents or mouse strains), data from replicate experiments were pooled for graphical representation. All replicates are biological replicates obtained from biologically independent experiments. |
| Randomization   | Allocation was not random. Since we used littermate animals in each experimental and control groups, randomization was not relevant to our study.                                                                                                                                                                                                                                |
| Blinding        | All animal studies were not blinded since treatment and experimental analysis could not be separated, blinding of the investigators was not possible.                                                                                                                                                                                                                            |

## Reporting for specific materials, systems and methods

We require information from authors about some types of materials, experimental systems and methods used in many studies. Here, indicate whether each material, system or method listed is relevant to your study. If you are not sure if a list item applies to your research, read the appropriate section before selecting a response.

### Materials & experimental systems

| n/a                                 | Involved in the study                                           |
|-------------------------------------|-----------------------------------------------------------------|
| <input type="checkbox"/>            | <input checked="" type="checkbox"/> Antibodies                  |
| <input type="checkbox"/>            | <input checked="" type="checkbox"/> Eukaryotic cell lines       |
| <input checked="" type="checkbox"/> | <input type="checkbox"/> Palaeontology                          |
| <input type="checkbox"/>            | <input checked="" type="checkbox"/> Animals and other organisms |
| <input checked="" type="checkbox"/> | <input type="checkbox"/> Human research participants            |
| <input checked="" type="checkbox"/> | <input type="checkbox"/> Clinical data                          |

### Methods

| n/a                                 | Involved in the study                              |
|-------------------------------------|----------------------------------------------------|
| <input checked="" type="checkbox"/> | <input type="checkbox"/> ChIP-seq                  |
| <input type="checkbox"/>            | <input checked="" type="checkbox"/> Flow cytometry |
| <input checked="" type="checkbox"/> | <input type="checkbox"/> MRI-based neuroimaging    |

## Antibodies

### Antibodies used

antibody name/ supplier name /catalog number /clone name/ lot number /dilution /validation (website)  
 CD16/32 BioXCell BE0307 2.4G2 1:500 <https://bxc.com/product/invivomab-anti-mouse-cd16-cd32/>  
 CD45.2 BioLegend 109824 104 B240422 1:300 <https://www.biolegend.com/en-us/products/apc-cyanine7-anti-mouse-cd45-2-antibody-3906>  
 CD45.1 BioLegend 110708 A20 B146359 1:300 <https://www.biolegend.com/en-us/products/pe-anti-mouse-cd45-1-antibody-199>  
 CD45 BioLegend 103116 30-F11 B266564 1:300 <https://www.biolegend.com/en-us/products/apc-cyanine7-anti-mouse-cd45-antibody-2530>  
 CD3e BioLegend 100308 145-2C11 B253780 1:300 <https://www.biolegend.com/en-us/products/pe-anti-mouse-cd3epsilon-antibody-25>  
 CD4 BioLegend 100451 GK1.5 B223832 1:300 <https://www.biolegend.com/en-us/products/brilliant-violet-605-anti-mouse-cd4-antibody-10708>  
 CD4 BioLegend 100540 RM4-5 B161056 1:300 <https://www.biolegend.com/en-us/products/percpcyanine5-5-anti-mouse-cd4-antibody-4230>  
 CD8a BioLegend 100744 53-6.7 B266536 1:300 <https://www.biolegend.com/en-us/products/brilliant-violet-605-anti-mouse-cd8a-antibody-7636>  
 CD8a BioLegend 100747 53-6.7 B259952 1:300 <https://www.biolegend.com/en-us/products/brilliant-violet-711-anti-mouse-cd8a-antibody-7926>  
 CD19 BioLegend 115540 6D5 B264622 1:200 <https://www.biolegend.com/en-us/products/brilliant-violet-605-anti-mouse-cd19-antibody-7645>  
 CD19 BD Biosciences 564296 1D3 8039779 1:200 <http://www.bdbiosciences.com/us/reagents/research/antibodies-buffers/immunology-reagents/anti-mouse-antibodies/cell-surface-antigens/buv737-rat-anti-mouse-cd19-1d3/p/564296>

CD45R/B220 BioLegend 103236 RA3-6B2 B253647 1:200 <https://www.biolegend.com/en-us/products/percp-cy5-5-anti-mouse-human-cd45r-b220-antibody-4267>

CD138 BioLegend 142519 281-2 B248101 1:200 <https://www.biolegend.com/en-us/products/brilliant-violet-711-anti-mouse-cd138-syndecan-1-antibody-8909>

CD138 BioLegend 142507 281-2 B253736 1:200 <https://www.biolegend.com/en-us/products/brilliant-violet-421-anti-mouse-cd138-syndecan-1-antibody-7852>

CD38 BioLegend 102717 90 B242687 1:200 <https://www.biolegend.com/en-us/products/pe-cy7-anti-mouse-cd38-antibody-3926>

CD38 BioLegend 102719 90 B139813 1:200 <https://www.biolegend.com/en-us/products/pacific-blue-anti-mouse-cd38-antibody-6652>

GL7 BD Biosciences 561530 GL7 4330708 1:200 <http://www.bdbiosciences.com/ds/pm/tds/561530.pdf>

MHCII (I-A/I-E) BioLegend 107622 M5/114.15.2 B264454 1:800 <https://www.biolegend.com/en-us/products/alexa-fluor-700-anti-mouse-i-a-i-e-antibody-3413>

CD11c BioLegend 117329 N418 B258584 1:200 <https://www.biolegend.com/en-us/products/brilliant-violet-421-anti-mouse-cd11c-antibody-7149>

IgD BD Biosciences 564274 11-26c.2a 8046964 1:200 <http://www.bdbiosciences.com/us/reagents/research/antibodies-buffers/second-step-reagents/anti-ig/buv395-rat-anti-mouse-igd-11-26c2a/p/564274>

CD44 BioLegend 103026 IM7 B244378 1:200 <https://www.biolegend.com/en-us/products/alexa-fluor-700-anti-mouse-human-cd44-antibody-3406>

PD-L2 BioLegend 107210 TY25 B245340 1:200 <https://www.biolegend.com/en-us/products/apc-anti-mouse-cd273-b7-dc--pd-l2-antibody-12353>

CD80 BioLegend 104734 16-10A1 B249923 1:200 <https://www.biolegend.com/en-us/products/pe-cy7-anti-mouse-cd80-antibody-9320>

CD69 BioLegend 104512 H1.2F3 B253212 1:200 <https://www.biolegend.com/en-us/products/pe-cy7-anti-mouse-cd69-antibody-3168>

CD86 BioLegend 105011 GL1 B245161 1:200 <https://www.biolegend.com/en-us/products/apc-anti-mouse-cd86-antibody-2896>

AF488 goat anti-mouse IgG (H+L) Invitrogen A11029 polyclonal 1829910 1:800

AF647 donkey anti-mouse IgG (H+L) Fab Jackson ImmunoResearch 715-607-003 polyclonal 128907 1:600

CCR1 R&D Systems FAB5986P 643854 ABQH0314071 10ul/test [https://www.rndsystems.com/products/mouse-ccr1-pe-conjugated-antibody-643854\\_fab5986p](https://www.rndsystems.com/products/mouse-ccr1-pe-conjugated-antibody-643854_fab5986p)

CCR2 R&D Systems FAB5538F 475301 ABPZ0212011 10ul/test [https://www.rndsystems.com/products/mouse-ccr2-fluorescein-conjugated-antibody-475301\\_fab5538f](https://www.rndsystems.com/products/mouse-ccr2-fluorescein-conjugated-antibody-475301_fab5538f)

CCR3 BD Biosciences 557974 83103 1:200 <http://www.bdbiosciences.com/us/applications/research/t-cell-immunology/th-2-cells/surface-markers/mouse/alexa-fluor-647-rat-anti-mouse-cd193-83103/p/557974>

CCR4 BioLegend 131214 2G12 B201546 1:200 <https://www.biolegend.com/en-us/products/pe-cy7-anti-mouse-cd194-ccr4-antibody-6333>

CCR5 BioLegend 107012 HM-CCR5 B186964 1:200 <https://www.biolegend.com/en-us/products/apc-anti-mouse-cd195-ccr5-antibody-3939>

CCR6 BioLegend 129815 29-2L17 B187956 1:200 <https://www.biolegend.com/en-us/products/pe-cy7-anti-mouse-cd196-ccr6-antibody-6152>

CCR7 BioLegend 120105 4B12 B254167 1:200 <https://www.biolegend.com/en-us/products/pe-anti-mouse-cd197-ccr7-antibody-2799>

CCR8 BioLegend 150311 SA214G2 B224699 1:200 <https://www.biolegend.com/en-us/products/pe-anti-mouse-cd198-ccr8-antibody-13428>

CCR9 BioLegend 128705 CW-1.2 B120356 1:200 <https://www.biolegend.com/en-us/products/fitc-anti-mouse-cd199-ccr9-antibody-5123>

CCR10 R&D Systems FAB2815P 248918 LXL0207011 10ul/test [https://www.rndsystems.com/products/mouse-ccr10-pe-conjugated-antibody-248918\\_fab2815p](https://www.rndsystems.com/products/mouse-ccr10-pe-conjugated-antibody-248918_fab2815p)

CXCR1 R&D Systems FAB8628P 1122A AENE0115111 10ul/test [https://www.rndsystems.com/products/mouse-cxcr1-il-8-ra-pe-conjugated-antibody-1122a\\_fab8628p](https://www.rndsystems.com/products/mouse-cxcr1-il-8-ra-pe-conjugated-antibody-1122a_fab8628p)

CXCR2 BioLegend 129101 TG11/CXCR2 B119951 1:200

CXCR3 BioLegend 126506 CXCR3-173 B137934 1:200 <https://www.biolegend.com/en-us/products/pe-anti-mouse-cd183-cxcr3-antibody-4592>

CXCR3 BioLegend 126512 CXCR3-173 B233225 1:200 <https://www.biolegend.com/en-us/products/apc-anti-mouse-cd183-cxcr3-antibody-4683>

CXCR4 BD Biosciences 551966 2B11/CXCR4 1:200 <http://www.bdbiosciences.com/us/applications/research/t-cell-immunology/regulatory-t-cells/surface-markers/mouse/pe-rat-anti-mouse-cd184-2b11cxcr4/p/551966>

CXCR5 BioLegend 145515 L138D7 B170134 1:200 <https://www.biolegend.com/en-us/products/pe-cy7-anti-mouse-cd185-cxcr5-antibody-8617>

CXCR6 BioLegend 151105 SA051D1 B224895 1:200 <https://www.biolegend.com/en-us/products/apc-anti-mouse-cd186-cxcr6-antibody-13065>

IFN-g BioLegend 505810 XMG1.2 B221722 1:200 <https://www.biolegend.com/en-us/products/apc-anti-mouse-ifn-gamma-antibody-993>

CD4 blocking Ab BioXCell BE0003-1 GK1.5 699918M2 <https://bxcell.com/product/m-cd4/>

IFN-g blocking Ab BioXCell BE0054 R4-6A2 601516A2 <https://bxcell.com/product/m-inf-gamma/>

FITC mouse IgG Jackson ImmunoResearch 211-095-109 polyclonal 131785

mIgG1 anti-HSV gD MAb Absolute Antibody Ab00442-1.1 E317 T1832B15 [https://absoluteantibody.com/product/anti-glycoprotein-d-of-hsv-e317/Ab00442-1.1\\_Mouse\\_IgG1/](https://absoluteantibody.com/product/anti-glycoprotein-d-of-hsv-e317/Ab00442-1.1_Mouse_IgG1/)

CD4 BD Biosciences 553649 H129.19 1:320 <http://www.bdbiosciences.com/us/applications/research/t-cell-immunology/th-1-cells/surface-markers/mouse/biotin-rat-anti-mouse-cd4-h12919/p/553649>

CD45R/B220 BioLegend 103208 RA3-6B2 B224683 1:200 <https://www.biolegend.com/en-us/products/pe-anti-mouse-human-cd45r-b220-antibody-447>

CD138 BioLegend 142511 281-2 B183667 1:100 <https://www.biolegend.com/en-us/products/biotin-anti-mouse-cd138-syndecan-1-antibody-8449>

CD31 eBioscience 13-0311-81 390 1:100 <https://www.thermofisher.com/antibody/product/CD31-PECAM-1-Antibody-clone-390-Monoclonal/13-0311-81>

VCAM-1 BioLegend 105703 429/MVCAM.A 1:100 <https://www.biolegend.com/en-us/products/biotin-anti-mouse-cd106-antibody-136>  
 AF647 anti-FITC Ab Jackson ImmunoResearch 200-602-037 135650  
 AF568 anti-mouse IgG (H+L) Invitrogen A10037 polyclonal  
 FITC pAbs against HSV1 and 2 Virostat 0196  
 HRP-conjugated anti-mouse IgG1 SouthernBiotech 1070-05 polyclonal D0812-WC82B 1:1000 <https://www.southernbiotech.com/?catno=1070-05&type=Polyclonal#&panel1-1&panel2-1>  
 HRP-conjugated anti-mouse IgG3 SouthernBiotech 1100-05 polyclonal B0308-Z781C 1:1000 <https://www.southernbiotech.com/?catno=1100-05&type=Polyclonal#&panel1-1&panel2-1>  
 HRP-conjugated anti-mouse IgM SouthernBiotech 1020-05 polyclonal C0012-P252L 1:1000 <https://www.southernbiotech.com/?catno=1020-05&type=Polyclonal#&panel2-1>  
 HRP-conjugated anti-mouse IgA SouthernBiotech 1040-05 polyclonal I5613-R566B 1:1000 <https://www.southernbiotech.com/?catno=1040-05&type=Polyclonal#&panel1-1&panel2-1>  
 HRP-conjugated anti-mouse IgG2b SouthernBiotech 1090-05 polyclonal A2513-XA54E 1:1000 <https://www.southernbiotech.com/?catno=1090-05&type=Polyclonal#&panel1-1&panel2-1>  
 HRP-conjugated anti-mouse IgG2c SouthernBiotech 1079-05 polyclonal G0313-ZF85D 1:1000 <https://www.southernbiotech.com/?catno=1079-05&type=Polyclonal#&panel2-1>

## Validation

Quality of antibodies was tested by manufacturer (statements on the manufacturer's website) or relevant references were cited on the manufacturer's website. Vendor websites for antibodies were listed above and the validations can be found there.

## Eukaryotic cell lines

### Policy information about [cell lines](#)

|                                                                   |                                                                                                           |
|-------------------------------------------------------------------|-----------------------------------------------------------------------------------------------------------|
| Cell line source(s)                                               | Vero cells (ATCC CCL-81)                                                                                  |
| Authentication                                                    | Cell lines were authenticated by morphology.                                                              |
| Mycoplasma contamination                                          | Cell lines were routinely tested for mycoplasma contamination, and negative for mycoplasma contamination. |
| Commonly misidentified lines (See <a href="#">ICLAC</a> register) | No misidentified cell lines in this study                                                                 |

## Animals and other organisms

### Policy information about [studies involving animals](#); [ARRIVE guidelines](#) recommended for reporting animal research

|                         |                                                                                                                                                                                                                                                                                                                                                          |
|-------------------------|----------------------------------------------------------------------------------------------------------------------------------------------------------------------------------------------------------------------------------------------------------------------------------------------------------------------------------------------------------|
| Laboratory animals      | Six to eight-week old female C57BL/6 (CD45.2+), congenic C57BL/6 B6.SJL-PtprcaPep3b/BoyJ (B6.Ly5.1) (CD45.1+), B6.129S2-Ighm1Cgn/J ( $\mu$ MT), B6.FVB-Tg[ITGAM-DTR/EGFP] 34Lan/J (CD11bDTR), B6.Cg-Tg(CAG-DsRed*MST)1Nagy/J (DsRed), and B6.129P2-Cxcr3tm1Dgen/J (CXCR3 <sup>-/-</sup> ) mice from the National Cancer Institute and Jackson Laboratory |
| Wild animals            | No wild animals were used in this study                                                                                                                                                                                                                                                                                                                  |
| Field-collected samples | No field-collected samples were used in this study                                                                                                                                                                                                                                                                                                       |
| Ethics oversight        | All procedures used in this study complied with federal guidelines and institutional policies by the Yale animal care and use committee (Protocol # 2018-10365).                                                                                                                                                                                         |

Note that full information on the approval of the study protocol must also be provided in the manuscript.

## Flow Cytometry

### Plots

Confirm that:

- The axis labels state the marker and fluorochrome used (e.g. CD4-FITC).
- The axis scales are clearly visible. Include numbers along axes only for bottom left plot of group (a 'group' is an analysis of identical markers).
- All plots are contour plots with outliers or pseudocolor plots.
- A numerical value for number of cells or percentage (with statistics) is provided.

### Methodology

|                    |                                                                                                                                                                                                                                                                                                                                                                                                                                                                                             |
|--------------------|---------------------------------------------------------------------------------------------------------------------------------------------------------------------------------------------------------------------------------------------------------------------------------------------------------------------------------------------------------------------------------------------------------------------------------------------------------------------------------------------|
| Sample preparation | The genital tracts of vaginal tissues and upper reproductive tracts including cervix and uterus treated with Depo-Provera were dissected from the urethra and cervix. Tissues were then incubated with 0.5 mg/mL Dispase II (Roche) for 15 min at 37 °C. Thereafter, tissues were digested with 1 mg/mL collagenase D (Roche) and 30 $\mu$ g/mL DNase I (Sigma-Aldrich) at 37 °C for 25 min. The resulting cells were filtered through a 70- $\mu$ m filter and single cells were isolated. |
| Instrument         | LSRII flow cytometer                                                                                                                                                                                                                                                                                                                                                                                                                                                                        |

|                           |                                                                                                                                                                                                                                                                                                                                 |
|---------------------------|---------------------------------------------------------------------------------------------------------------------------------------------------------------------------------------------------------------------------------------------------------------------------------------------------------------------------------|
| Software                  | FACS DIVA, FlowJo 10.4.2                                                                                                                                                                                                                                                                                                        |
| Cell population abundance | For B cell-sorted spleen samples, cell numbers were counted and 6,000 cells were prepared. Cells from primary and secondary infected FRT samples were prepared at a cell count proportional to the immune cell infiltration observed by flow cytometry. We separate CD3 and CD19 expressing clusters during scRNA seq analysis. |
| Gating strategy           | live/dead stain (Aqua)- gated -> CD45.2+ or CD45.1+ gated -> single cells (FSC-A/FSC-H) -> lymphocytes gated. We defined positive and negative population at the distinct border or by using isotype control stain.                                                                                                             |

Tick this box to confirm that a figure exemplifying the gating strategy is provided in the Supplementary Information.
